# Supplementary material for: The formation of a metalloid Sn10[Si(SiMe3)3]6cluster compound and its relation to the α↔β tin phase transition
Source: Royal Society of Chemistry journal article supplement (doi:10.1039/b921392a), 2009-12-23
Supplement: b921392a.pdf [file b921392a.pdf]

## Supplemental Information for

### The formation of a metalloid $\text{Sn}_{10}[\text{Si}(\text{SiMe}_3)_3]_6$ cluster compound and its relation to the $\alpha \leftrightarrow \beta$ tin phase transition.

Claudio Schrenk, Inga Schellenberg, Rainer Pöttgen and Andreas Schnepf\*

Table S1: Collection of bond distances (min. max. and average [pm]) of the different tin atoms in  $\text{Sn}_{10}[\text{Si}(\text{SiMe}_3)_3]_6$  **1** (c.n. = coordination number). In the case of the min./max. bond distances also the bonding partner is indicated (Sn1-Sn6 bear a ligand while Sn7-Sn10 are naked). Place indicates if the tin atoms is located at the cubic (c), the icosahedral (i) or in between (c/i) part of the centaur polyhedron.

|             | c.n. | Place | min.        | max.         | av.   |
|-------------|------|-------|-------------|--------------|-------|
| <b>Sn1</b>  | 4    | c     | 285.5 (Sn2) | 289.6 (Sn6)  | 287.7 |
| <b>Sn2</b>  | 4    | c     | 285.5 (Sn1) | 290.9 (Sn3)  | 288.0 |
| <b>Sn3</b>  | 5    | c     | 290.9 (Sn2) | 303.4 (Sn9)  | 298.9 |
| <b>Sn4</b>  | 5    | i     | 292.5 (Sn7) | 303.2 (Sn9)  | 298.7 |
| <b>Sn5</b>  | 5    | i     | 292.2 (Sn8) | 302.1 (Sn10) | 296.8 |
| <b>Sn6</b>  | 5    | c     | 289.6 (Sn1) | 304.1 (Sn10) | 297.3 |
| <b>Sn7</b>  | 4    | c     | 287.7 (Sn2) | 312.8 (Sn10) | 298.7 |
| <b>Sn8</b>  | 4    | c     | 288.1 (Sn1) | 314.2 (Sn9)  | 298.8 |
| <b>Sn9</b>  | 5    | i     | 299.4 (Sn5) | 314.2 (Sn8)  | 305.5 |
| <b>Sn10</b> | 5    | i     | 298.7 (Sn4) | 312.8 (Sn7)  | 305.2 |

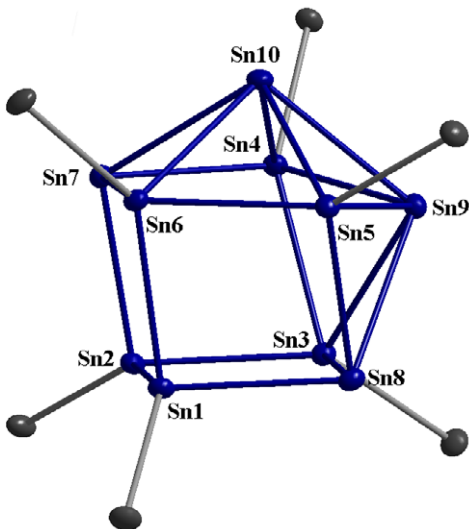

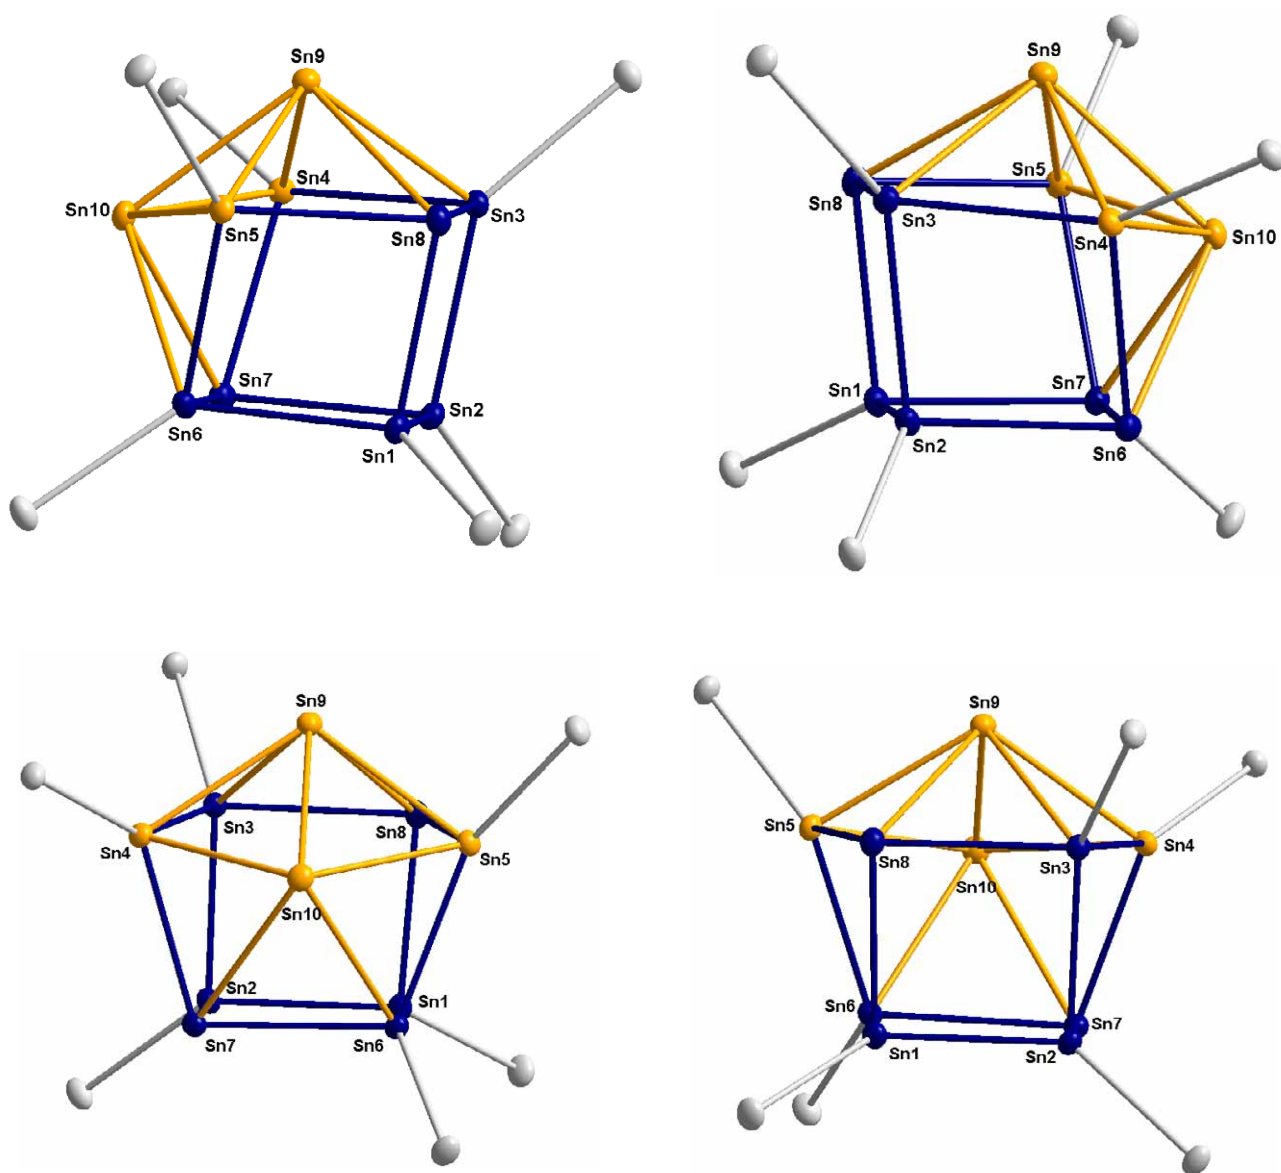

Figure S1: Different views of the centaur polyhedral arrangement of the 10 tin atoms in  $\text{Sn}_{10}[\text{Si}(\text{SiMe}_3)_3]_6$  **1** together with the directly bound silicon atoms of the  $\text{Si}(\text{SiMe}_3)_3$  ligands. The cube like part of the centaur polyhedron (Sn1, Sn2, Sn3, Sn6, Sn7, Sn8) is marked in blue while the icosahedral (Sn4, Sn5, Sn9, Sn10) part of the centaur polyhedron is marked in orange.
